# Supplementary material
Source: Springer Nature journal article supplement (https://www.springermedizin.de/resource/supplementary/12875_2008_404_MOESM5_ESM.pdf/9434540)

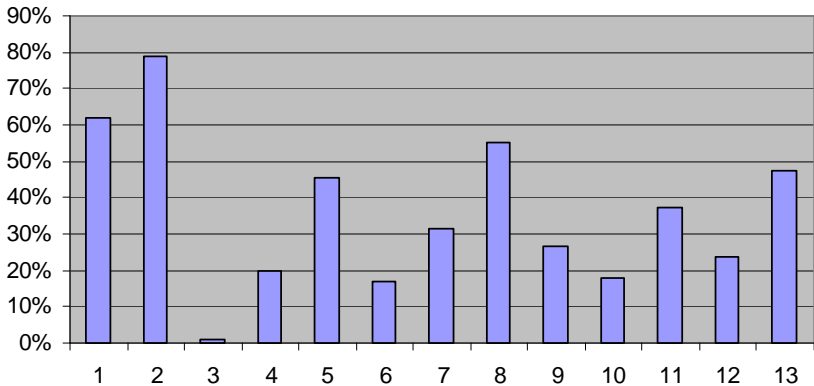

Supplement: MOESM5 [file 9434540]
